# Supplementary material
Source: PubMed Central journal article supplement (PMC2876373)
Supplement: supp_54_6_2489__1.pdf [file supp_54_6_2489__1.pdf]

## Supplemental Material

Suci et al., Targeted delivery of a photosensitizer

### Viability assay

#### CHG

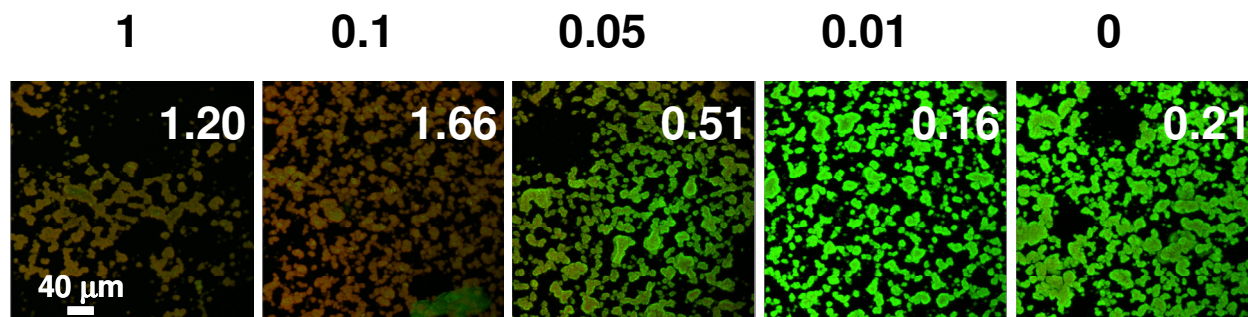

FIG.1S. Membrane disruption of *A. actinomycetemcomitans* biofilm microcolonies exposed to CHG assessed by the BacLight Live/Dead bacterial viability assay. Images are a composite of sections acquired through the biofilms. Biofilms were exposed to CHG concentrations (mg/ml) indicated by the numbers above of each image. Red/green ratios estimated as described in the Methods section are presented by the numbers on each image.

#### Biofilm targeted with PS

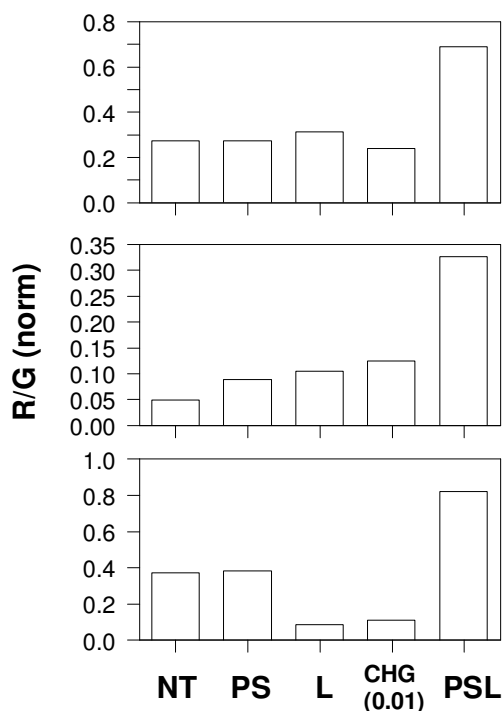

FIG.2S. Membrane disruption of *A. actinomycetemcomitans* biofilm microcolonies targeted with the PS assessed by the BacLight Live/Dead bacterial viability assay (summary of the results of three independent experiments); NT: not treated; PS: targeted with PS, no light exposure; L: exposed to light, not-targeted; CHG(.01): exposed to 0.01 mg/ml CHG; PSL: targeted with PS and exposed to light; Red/green ratios (R/G norm) were normalized to the red/green ratio obtain for exposure to 0.1 mg/ml CHG as described in the Methods section.
